# Supplementary figures and images for: Acute effects of alemtuzumab infusion in patients with active relapsing-remitting MS
Source: PubMed Central journal article supplement — Neurol Neuroimmunol Neuroinflamm. 2016 Apr 29;3(3):e228. doi: 10.1212/NXI.0000000000000228 (PMC4853056; doi:10.1212/nxi.0000000000000228), 2016-04-29

# Suppl. Fig.e-1

(a)

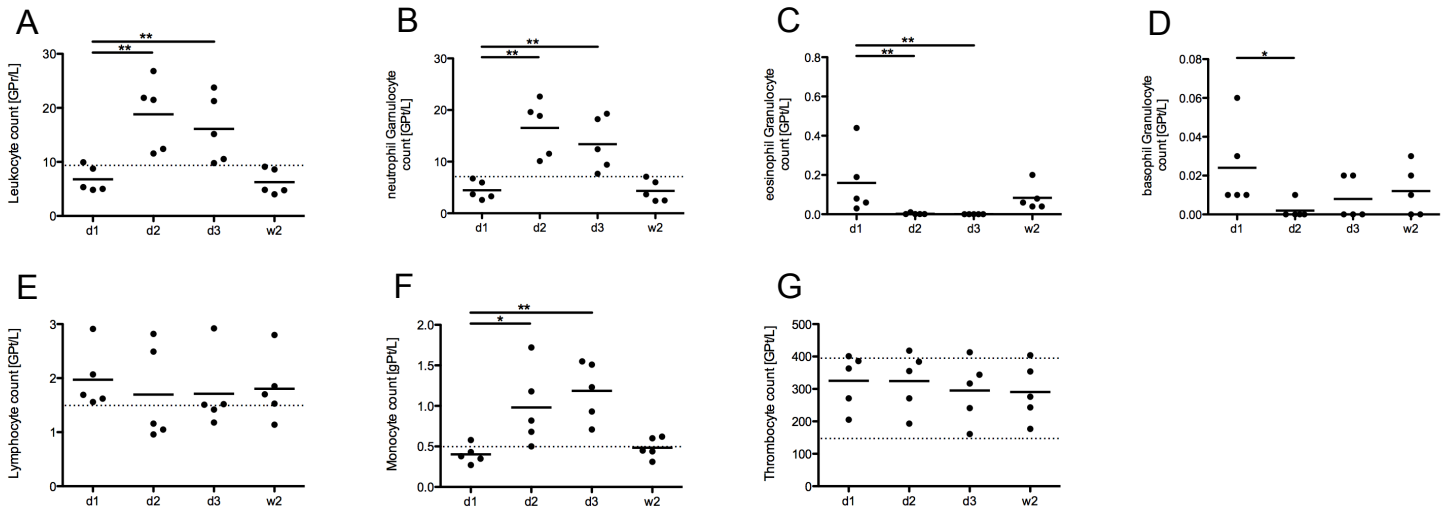

(b)

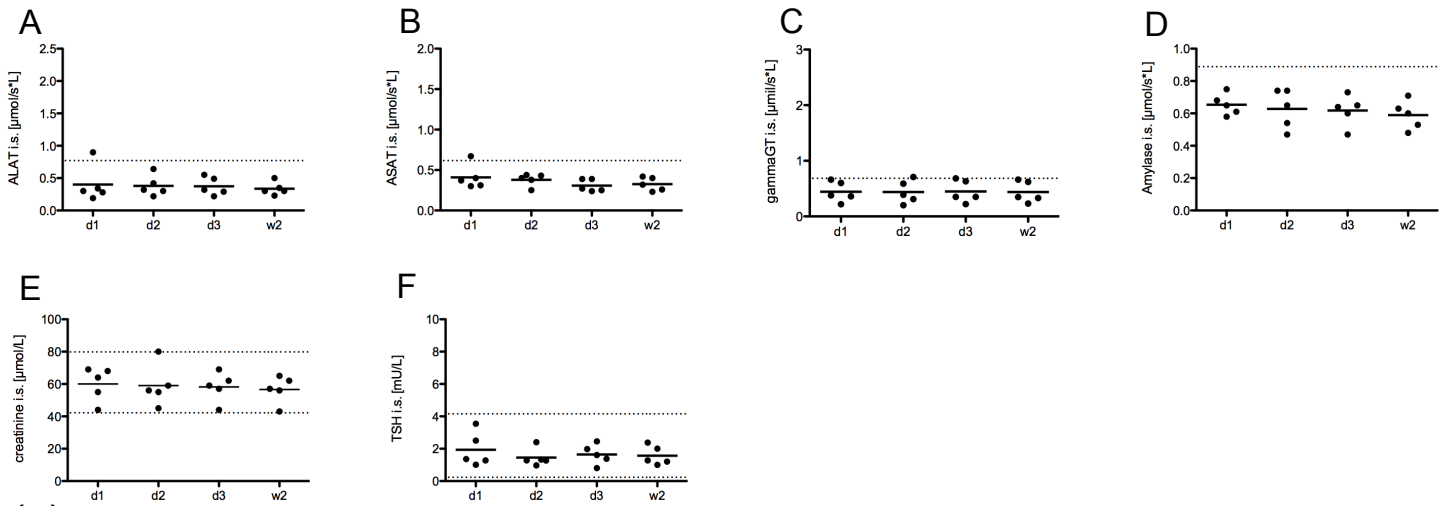

(c)

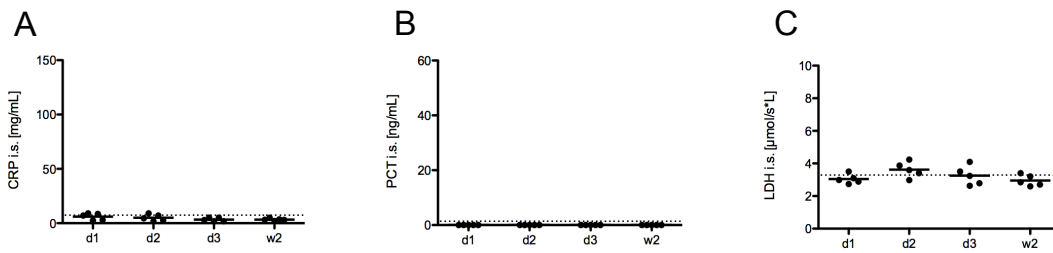

Supplement: supp_3.3.e228_Suppl._Fig.e-1.pdf [file supp_3.3.e228_Suppl._Fig.e-1.pdf]
